# Supplementary material for: Assessing Heavy Metals in the Sele River Estuary: An Overview of Pollution Indices in Southern Italy
Source: MDPI journal article supplement (doi:10.3390/toxics12010038), 2024-01-03
Supplement: s1 [file s1]

# Assessing Heavy Metals in the Sele River Estuary: An Overview of Pollution Indices in Southern Italy

**Fabiana Di Duca, Paolo Montuori \*, Elvira De Rosa, Bruna De Simone, Immacolata Russo, Raffaele Nubi and Maria Triassi**

Department of Public Health, University “Federico II”, Via Sergio Pansini 5, 80131 Naples, Italy; fabianadiduca91@gmail.com (F.D.D.); derosaelvira92@gmail.com (E.D.R.); desimonebruna7@gmail.com (B.D.S.); imrusso@unina.it (I.R.); raf.nubi@gmail.com (R.N.); triassi@unina.it (M.T.)

\* Correspondence: pmontuor@unina.it

**Table S1.** Description of the sampling sites and heavy metals concentration ( $\mu\text{g/L}$ ) detected in the water dissolved phase (DP) of the Sele River, southern Italy.

| Location ID        | Season   | As              | Hg              | Cd              | Cr               | Cu              | Ni               | Pb               | Zn              |
|--------------------|----------|-----------------|-----------------|-----------------|------------------|-----------------|------------------|------------------|-----------------|
| 1<br>(river water) | July     | $6.84 \pm 3.15$ | $2.35 \pm 1.13$ | $1.45 \pm 0.48$ | $14.97 \pm 4.97$ | $3.02 \pm 1.00$ | $11.15 \pm 3.73$ | $14.41 \pm 4.78$ | $4.17 \pm 1.37$ |
|                    | November | $1.17 \pm 0.51$ | $0.23 \pm 0.09$ | $0.52 \pm 0.18$ | $3.95 \pm 1.32$  | $< 1.57$        | $1.94 \pm 0.63$  | $1.64 \pm 0.53$  | $2.25 \pm 0.77$ |
|                    | February | $1.55 \pm 0.73$ | $< 0.23$        | $< 0.50$        | $0.91 \pm 0.32$  | $< 1.57$        | $< 1.73$         | $< 1.57$         | $2.18 \pm 0.71$ |
|                    | April    | $3.32 \pm 1.60$ | $0.57 \pm 0.18$ | $0.63 \pm 0.21$ | $11.12 \pm 3.69$ | $1.67 \pm 0.54$ | $5.58 \pm 1.84$  | $4.82 \pm 1.62$  | $2.69 \pm 0.87$ |
| 2<br>(sea water)   | July     | $5.70 \pm 1.87$ | $0.72 \pm 0.22$ | $0.84 \pm 0.29$ | $3.71 \pm 1.18$  | $1.79 \pm 1.27$ | $2.81 \pm 0.94$  | $1.59 \pm 0.52$  | $5.46 \pm 1.83$ |
|                    | November | $0.69 \pm 0.22$ | $< 0.23$        | $< 0.50$        | $0.62 \pm 0.17$  | $< 1.57$        | $< 1.73$         | $< 1.57$         | $< 2.17$        |
|                    | February | $< 0.67$        | $< 0.23$        | $< 0.50$        | $< 0.63$         | $< 1.57$        | $< 1.73$         | $< 1.57$         | $< 2.17$        |
|                    | April    | $2.41 \pm 0.81$ | $< 0.23$        | $< 0.50$        | $1.96 \pm 0.66$  | $1.58 \pm 0.54$ | $2.12 \pm 0.69$  | $< 1.57$         | $2.92 \pm 0.97$ |
| 3<br>(sea water)   | July     | $2.58 \pm 0.85$ | $0.25 \pm 0.09$ | $0.53 \pm 0.18$ | $1.54 \pm 0.52$  | $1.71 \pm 0.56$ | $1.76 \pm 0.61$  | $< 1.57$         | $2.21 \pm 0.75$ |
|                    | November | $< 0.67$        | $< 0.23$        | $< 0.50$        | $0.64 \pm 0.19$  | $< 1.57$        | $< 1.73$         | $< 1.57$         | $< 2.17$        |
|                    | February | $< 0.67$        | $< 0.23$        | $< 0.50$        | $< 0.63$         | $< 1.57$        | $< 1.73$         | $< 1.57$         | $< 2.17$        |
|                    | April    | $0.74 \pm 0.25$ | $< 0.23$        | $< 0.50$        | $< 0.63$         | $1.57 \pm 0.52$ | $< 1.73$         | $< 1.57$         | $< 2.17$        |
| 4<br>(sea water)   | July     | $0.68 \pm 0.28$ | $< 0.23$        | $< 0.50$        | $0.68 \pm 0.20$  | $< 1.57$        | $< 1.73$         | $< 1.57$         | $< 2.17$        |
|                    | November | $< 0.67$        | $< 0.23$        | $< 0.50$        | $< 0.63$         | $< 1.57$        | $< 1.73$         | $< 1.57$         | $< 2.17$        |
|                    | February | $< 0.67$        | $< 0.23$        | $< 0.50$        | $< 0.63$         | $< 1.57$        | $< 1.73$         | $< 1.57$         | $< 2.17$        |
|                    | April    | $< 0.67$        | $< 0.23$        | $< 0.50$        | $< 0.63$         | $< 1.57$        | $< 1.73$         | $< 1.57$         | $< 2.17$        |
| 5<br>(sea water)   | July     | $2.36 \pm 0.79$ | $0.92 \pm 0.28$ | $0.82 \pm 0.24$ | $6.17 \pm 2.04$  | $1.66 \pm 0.53$ | $5.81 \pm 1.91$  | $4.43 \pm 1.45$  | $2.25 \pm 0.72$ |
|                    | November | $< 0.67$        | $< 0.23$        | $< 0.50$        | $1.65 \pm 0.52$  | $< 1.57$        | $< 1.73$         | $< 1.57$         | $< 2.17$        |
|                    | February | $0.52 \pm 0.16$ | $< 0.23$        | $< 0.50$        | $< 0.63$         | $< 1.57$        | $< 1.73$         | $< 1.57$         | $< 2.17$        |
|                    | April    | $1.39 \pm 0.44$ | $0.23 \pm 0.05$ | $0.52 \pm 0.16$ | $5.36 \pm 1.74$  | $1.59 \pm 0.49$ | $2.34 \pm 0.75$  | $1.90 \pm 0.61$  | $< 2.17$        |
| 6<br>(sea water)   | July     | $< 0.67$        | $0.42 \pm 1.21$ | $0.60 \pm 0.19$ | $1.93 \pm 0.61$  | $1.57 \pm 0.51$ | $3.58 \pm 1.15$  | $1.68 \pm 0.53$  | $< 2.17$        |
|                    | November | $< 0.67$        | $< 0.23$        | $< 0.50$        | $0.65 \pm 0.19$  | $< 1.57$        | $< 1.73$         | $< 1.57$         | $< 2.17$        |
|                    | February | $< 0.67$        | $< 0.23$        | $< 0.50$        | $< 0.63$         | $< 1.57$        | $< 1.73$         | $< 1.57$         | $< 2.17$        |
|                    | April    | $< 0.67$        | $< 0.23$        | $< 0.50$        | $3.50 \pm 1.13$  | $< 1.57$        | $1.85 \pm 0.57$  | $< 1.57$         | $< 2.17$        |
| 7<br>(sea water)   | July     | $< 0.67$        | $< 0.23$        | $< 0.50$        | $0.79 \pm 0.23$  | $< 1.57$        | $1.76 \pm 0.56$  | $< 1.57$         | $< 2.17$        |
|                    | November | $< 0.67$        | $< 0.23$        | $< 0.50$        | $< 0.63$         | $< 1.57$        | $< 1.73$         | $< 1.57$         | $< 2.17$        |
|                    | February | $< 0.67$        | $< 0.23$        | $< 0.50$        | $< 0.63$         | $< 1.57$        | $< 1.73$         | $< 1.57$         | $< 2.17$        |

|                   |          |              |             |             |              |              |             |             |             |
|-------------------|----------|--------------|-------------|-------------|--------------|--------------|-------------|-------------|-------------|
|                   | April    | < 0.67       | < 0.23      | < 0.50      | 1.01 ± 0.31  | < 1.57       | < 1.73      | < 1.57      | < 2.17      |
| 8<br>(sea water)  | July     | 14.28 ± 4.73 | 1.87 ± 0.57 | 1.69 ± 0.52 | 12.41 ± 4.09 | 13.23 ± 4.42 | 8.73 ± 2.88 | 3.12 ± 1.00 | 3.32 ± 1.09 |
|                   | November | 1.15 ± 0.36  | 0.25 ± 0.07 | 0.54 ± 0.14 | 2.89 ± 0.93  | 3.74 ± 1.20  | 1.84 ± 0.60 | < 1.57      | 2.19 ± 0.71 |
|                   | February | 6.47 ± 2.10  | < 0.23      | < 0.50      | 0.68 ± 0.18  | < 1.57       | < 1.73      | < 1.57      | < 2.17      |
|                   | April    | 1.62 ± 0.53  | 0.61 ± 0.19 | 0.82 ± 0.23 | 11.54 ± 3.81 | 7.52 ± 2.48  | 3.62 ± 1.17 | 1.60 ± 0.51 | 2.35 ± 0.75 |
| 9<br>(sea water)  | July     | 7.59 ± 2.49  | 1.45 ± 0.45 | 0.73 ± 0.21 | 5.72 ± 1.88  | 5.42 ± 1.78  | 3.79 ± 1.22 | < 1.57      | 2.38 ± 0.71 |
|                   | November | < 0.67       | < 0.23      | < 0.50      | 1.05 ± 0.33  | < 1.57       | < 1.73      | < 1.57      | < 2.17      |
|                   | February | 1.13 ± 0.31  | < 0.23      | < 0.50      | 0.67 ± 0.19  | < 1.57       | < 1.73      | < 1.57      | < 2.17      |
|                   | April    | 2.91 ± 0.92  | 0.34 ± 0.09 | 0.50 ± 0.13 | 4.48 ± 1.41  | 3.56 ± 1.11  | 1.89 ± 0.59 | < 1.57      | 2.18 ± 0.65 |
| 10<br>(sea water) | July     | 3.30 ± 0.97  | 0.42 ± 0.11 | 0.58 ± 0.15 | 2.69 ± 0.85  | 2.35 ± 0.73  | 1.80 ± 0.56 | < 1.57      | 2.20 ± 0.72 |
|                   | November | < 0.67       | < 0.23      | < 0.50      | 0.71 ± 0.21  | < 1.57       | < 1.73      | < 1.57      | < 2.17      |
|                   | February | < 0.67       | < 0.23      | < 0.50      | < 0.63       | < 1.57       | < 1.73      | < 1.57      | < 2.17      |
|                   | April    | 1.21 ± 0.37  | < 0.23      | 0.51 ± 0.13 | 1.30 ± 0.39  | 1.58 ± 0.48  | < 1.73      | < 1.57      | 2.17 ± 0.66 |

**Table S2.** Description of the sampling sites and heavy metals concentration ( $\mu\text{g/L}$ ) detected in Suspended Particulate Matter (SPM) of the Sele River, southern Italy.

| Location ID        | Season   | As                | Hg              | Cd              | Cr               | Cu                 | Ni                | Pb                | Zn                |
|--------------------|----------|-------------------|-----------------|-----------------|------------------|--------------------|-------------------|-------------------|-------------------|
| 1<br>(river water) | July     | 75.23 $\pm$ 24.97 | 6.94 $\pm$ 2.29 | 2.06 $\pm$ 0.61 | 17.45 $\pm$ 5.73 | 100.69 $\pm$ 33.41 | 54.03 $\pm$ 17.78 | 86.66 $\pm$ 28.73 | 90.28 $\pm$ 29.95 |
|                    | November | 19.65 $\pm$ 6.45  | 2.11 $\pm$ 0.64 | 0.52 $\pm$ 0.15 | 3.20 $\pm$ 1.02  | 18.54 $\pm$ 6.08   | 10.34 $\pm$ 3.38  | 33.28 $\pm$ 11.01 | 2.19 $\pm$ 0.67   |
|                    | February | 4.59 $\pm$ 1.52   | 1.84 $\pm$ 0.51 | < 0.50          | 1.54 $\pm$ 0.47  | 8.96 $\pm$ 2.85    | 2.85 $\pm$ 0.85   | 13.50 $\pm$ 4.44  | < 2.17            |
|                    | April    | 37.82 $\pm$ 12.53 | 2.47 $\pm$ 0.76 | 1.01 $\pm$ 0.30 | 7.43 $\pm$ 2.38  | 71.21 $\pm$ 23.64  | 24.86 $\pm$ 8.19  | 53.07 $\pm$ 17.67 | 30.24 $\pm$ 10.03 |
| 2<br>(sea water)   | July     | 20.31 $\pm$ 6.65  | 3.07 $\pm$ 1.00 | 0.74 $\pm$ 0.22 | 9.76 $\pm$ 3.18  | 36.77 $\pm$ 12.16  | 7.02 $\pm$ 2.27   | 19.35 $\pm$ 6.32  | 29.05 $\pm$ 9.61  |
|                    | November | 5.24 $\pm$ 1.72   | 0.48 $\pm$ 0.13 | < 0.50          | 2.07 $\pm$ 0.66  | 11.52 $\pm$ 3.81   | 5.93 $\pm$ 1.85   | 10.47 $\pm$ 3.40  | 2.19 $\pm$ 0.63   |
|                    | February | 8.50 $\pm$ 2.77   | 0.40 $\pm$ 0.09 | < 0.50          | 1.58 $\pm$ 0.47  | 1.88 $\pm$ 0.53    | < 1.73            | 1.68 $\pm$ 0.53   | < 2.17            |
|                    | April    | 0.85 $\pm$ 0.23   | 1.05 $\pm$ 0.32 | < 0.50          | 4.27 $\pm$ 1.33  | 25.50 $\pm$ 8.41   | 8.96 $\pm$ 2.88   | 22.81 $\pm$ 7.46  | 14.78 $\pm$ 4.81  |
| 3<br>(sea water)   | July     | 7.42 $\pm$ 2.44   | 1.86 $\pm$ 0.60 | < 0.50          | 4.91 $\pm$ 1.58  | 4.63 $\pm$ 1.44    | 4.21 $\pm$ 1.31   | 8.29 $\pm$ 2.65   | 10.39 $\pm$ 3.34  |
|                    | November | 2.54 $\pm$ 0.82   | 0.69 $\pm$ 0.18 | < 0.50          | 1.01 $\pm$ 0.31  | 17.82 $\pm$ 5.84   | < 1.73            | 4.54 $\pm$ 1.43   | < 2.17            |
|                    | February | < 0.67            | < 0.23          | < 0.50          | 0.89 $\pm$ 0.25  | < 1.57             | < 1.73            | < 1.57            | < 2.17            |
|                    | April    | 6.87 $\pm$ 2.25   | 0.54 $\pm$ 0.16 | < 0.50          | 1.67 $\pm$ 0.49  | 9.58 $\pm$ 3.08    | 5.08 $\pm$ 1.58   | 10.32 $\pm$ 3.32  | 6.59 $\pm$ 2.08   |
| 4<br>(sea water)   | July     | 0.75 $\pm$ 0.24   | 0.78 $\pm$ 0.24 | 0.51 $\pm$ 0.15 | 2.64 $\pm$ 0.77  | < 1.57             | < 1.73            | 2.21 $\pm$ 0.65   | 5.07 $\pm$ 1.58   |
|                    | November | 0.69 $\pm$ 0.19   | 0.63 $\pm$ 0.17 | < 0.50          | 1.36 $\pm$ 0.35  | 8.96 $\pm$ 2.89    | < 1.73            | < 1.57            | < 2.17            |
|                    | February | < 0.67            | < 0.23          | < 0.50          | 0.87 $\pm$ 0.23  | < 1.57             | < 1.73            | < 1.57            | < 2.17            |
|                    | April    | 1.29 $\pm$ 0.42   | < 0.23          | < 0.50          | 0.75 $\pm$ 0.19  | 4.33 $\pm$ 1.31    | 1.79 $\pm$ 0.52   | 3.86 $\pm$ 1.21   | 2.17 $\pm$ 0.59   |
| 5<br>(sea water)   | July     | 42.08 $\pm$ 13.99 | 4.97 $\pm$ 1.63 | 1.03 $\pm$ 0.25 | 10.10 $\pm$ 3.29 | 64.91 $\pm$ 21.53  | 21.05 $\pm$ 6.92  | 53.69 $\pm$ 17.81 | 47.88 $\pm$ 15.86 |
|                    | November | 12.69 $\pm$ 4.2   | 1.05 $\pm$ 0.29 | < 0.50          | 2.62 $\pm$ 0.82  | 25.83 $\pm$ 8.51   | 11.27 $\pm$ 3.64  | 24.78 $\pm$ 8.15  | < 2.17            |
|                    | February | 1.96 $\pm$ 0.63   | 0.91 $\pm$ 0.24 | < 0.50          | 1.87 $\pm$ 0.58  | 5.17 $\pm$ 1.62    | 2.18 $\pm$ 0.66   | 5.21 $\pm$ 1.65   | < 2.17            |
|                    | April    | 18.37 $\pm$ 6.08  | 1.56 $\pm$ 0.48 | 0.65 $\pm$ 0.12 | 5.28 $\pm$ 1.73  | 41.87 $\pm$ 12.95  | 21.29 $\pm$ 6.08  | 34.65 $\pm$ 11.47 | 20.67 $\pm$ 6.78  |
| 6<br>(sea water)   | July     | 28.93 $\pm$ 9.61  | 3.21 $\pm$ 1.03 | 0.87 $\pm$ 0.21 | 7.41 $\pm$ 2.44  | 26.53 $\pm$ 8.75   | 10.40 $\pm$ 3.36  | 30.20 $\pm$ 9.94  | 24.89 $\pm$ 8.21  |
|                    | November | 5.04 $\pm$ 1.66   | 1.10 $\pm$ 0.32 | < 0.50          | 1.09 $\pm$ 0.32  | 9.65 $\pm$ 3.10    | 3.25 $\pm$ 1.01   | 8.57 $\pm$ 2.77   | < 2.17            |
|                    | February | 0.78 $\pm$ 0.24   | 0.74 $\pm$ 0.21 | < 0.50          | 0.88 $\pm$ 0.24  | 1.59 $\pm$ 0.45    | < 1.73            | 1.84 $\pm$ 0.53   | < 2.17            |
|                    | April    | 8.65 $\pm$ 2.78   | 0.86 $\pm$ 0.27 | 0.59 $\pm$ 0.21 | 2.17 $\pm$ 0.66  | 26.84 $\pm$ 8.86   | 12.36 $\pm$ 4.03  | 19.86 $\pm$ 6.52  | 11.56 $\pm$ 3.74  |
| 7<br>(sea water)   | July     | 12.09 $\pm$ 3.97  | 1.23 $\pm$ 0.36 | < 0.50          | 3.13 $\pm$ 1.01  | 6.21 $\pm$ 2.00    | 6.18 $\pm$ 1.95   | 9.28 $\pm$ 2.96   | 9.21 $\pm$ 2.96   |
|                    | November | 1.84 $\pm$ 0.55   | 0.87 $\pm$ 0.25 | < 0.50          | 1.05 $\pm$ 0.28  | 4.07 $\pm$ 1.25    | < 1.73            | 2.70 $\pm$ 0.83   | < 2.17            |
|                    | February | < 0.67            | < 0.23          | < 0.50          | < 0.63           | < 1.57             | < 1.73            | < 1.57            | < 2.17            |

|             |          |                    |                  |                 |                   |                    |                   |                   |                    |
|-------------|----------|--------------------|------------------|-----------------|-------------------|--------------------|-------------------|-------------------|--------------------|
|             | April    | $2.07 \pm 0.63$    | $0.52 \pm 0.12$  | $0.54 \pm 0.09$ | $1.21 \pm 0.37$   | $8.03 \pm 2.56$    | $3.16 \pm 0.94$   | $8.95 \pm 2.77$   | $4.58 \pm 1.45$    |
|             | July     | $116.52 \pm 38.52$ | $10.03 \pm 3.27$ | $4.57 \pm 1.49$ | $33.47 \pm 11.06$ | $139.85 \pm 46.51$ | $88.74 \pm 29.47$ | $81.92 \pm 27.12$ | $107.54 \pm 35.68$ |
| 8           | November | $30.26 \pm 9.86$   | $3.11 \pm 0.95$  | $0.71 \pm 0.18$ | $8.56 \pm 2.78$   | $39.57 \pm 13.08$  | $21.06 \pm 6.93$  | $39.87 \pm 13.08$ | $2.25 \pm 0.63$    |
| (sea water) | February | $12.71 \pm 4.18$   | $1.07 \pm 0.33$  | $< 0.50$        | $4.03 \pm 1.26$   | $18.61 \pm 6.09$   | $3.29 \pm 1.02$   | $13.66 \pm 4.41$  | $< 2.17$           |
|             | April    | $56.88 \pm 18.72$  | $3.95 \pm 1.24$  | $2.10 \pm 0.62$ | $15.69 \pm 5.19$  | $92.05 \pm 30.56$  | $31.68 \pm 10.44$ | $59.40 \pm 19.69$ | $42.79 \pm 14.13$  |
|             | July     | $72.00 \pm 23.78$  | $4.20 \pm 1.38$  | $1.34 \pm 0.35$ | $14.28 \pm 4.67$  | $58.96 \pm 19.53$  | $44.52 \pm 14.73$ | $30.07 \pm 9.92$  | $48.96 \pm 16.22$  |
| 9           | November | $19.65 \pm 6.43$   | $1.08 \pm 0.35$  | $0.52 \pm 0.12$ | $3.17 \pm 0.96$   | $23.44 \pm 7.70$   | $10.37 \pm 3.35$  | $18.92 \pm 6.21$  | $< 2.17$           |
| (sea water) | February | $4.21 \pm 1.34$    | $0.79 \pm 0.22$  | $< 0.50$        | $1.29 \pm 0.37$   | $6.72 \pm 2.13$    | $1.87 \pm 0.51$   | $5.21 \pm 1.65$   | $< 2.17$           |
|             | April    | $31.52 \pm 10.46$  | $2.04 \pm 0.61$  | $0.93 \pm 0.26$ | $6.89 \pm 2.15$   | $39.57 \pm 13.07$  | $20.25 \pm 6.62$  | $28.54 \pm 9.43$  | $23.63 \pm 7.76$   |
|             | July     | $24.19 \pm 7.95$   | $2.48 \pm 0.80$  | $0.69 \pm 0.19$ | $6.08 \pm 1.89$   | $23.91 \pm 7.86$   | $19.88 \pm 6.54$  | $8.88 \pm 2.85$   | $27.30 \pm 8.98$   |
| 10          | November | $6.30 \pm 2.07$    | $0.86 \pm 0.26$  | $< 0.50$        | $1.92 \pm 0.54$   | $11.69 \pm 3.82$   | $4.19 \pm 1.33$   | $6.23 \pm 1.78$   | $< 2.17$           |
| (sea water) | February | $1.04 \pm 0.33$    | $< 0.23$         | $< 0.50$        | $0.75 \pm 0.17$   | $2.05 \pm 0.59$    | $< 1.73$          | $3.17 \pm 0.97$   | $< 2.17$           |
|             | April    | $9.89 \pm 3.23$    | $1.17 \pm 0.31$  | $0.53 \pm 0.17$ | $3.45 \pm 1.08$   | $16.80 \pm 5.47$   | $10.34 \pm 3.31$  | $11.95 \pm 3.84$  | $13.92 \pm 6.59$   |

**Table S3.** Description of sampling sites and heavy metals concentration detected in April in the sediment samples (SED) (mg/kg dw) of Sele River, southern Italy.

| Location ID        | As           | Hg          | Cd          | Cr            | Cu          | Ni            | Pb            | Zn            |
|--------------------|--------------|-------------|-------------|---------------|-------------|---------------|---------------|---------------|
| 1<br>(river water) | 5.96 ± 2.84  | 0.74 ± 0.33 | 0.28 ± 0.12 | 20.35 ± 10.16 | 7.32 ± 3.54 | 9.27 ± 4.55   | 10.63 ± 5.27  | 33.64 ± 16.72 |
| 2<br>(sea water)   | 3.21 ± 1.51  | < 0.70      | < 0.25      | 5.28 ± 2.63   | 2.96 ± 1.31 | 2.68 ± 1.30   | 3.42 ± 1.57   | 14.05 ± 6.88  |
| 3<br>(sea water)   | 1.09 ± 0.49  | < 0.70      | < 0.25      | 2.64 ± 1.27   | 2.47 ± 1.21 | < 2.67        | 2.05 ± 0.96   | 8.64 ± 4.09   |
| 4<br>(sea water)   | < 1.07       | < 0.70      | < 0.25      | 1.22 ± 0.56   | < 2.47      | < 2.67        | < 1.87        | 6.21 ± 2.97   |
| 5<br>(sea water)   | 4.12 ± 2.03  | < 0.70      | < 0.25      | 10.37 ± 5.13  | 3.64 ± 1.73 | 3.02 ± 1.42   | 6.28 ± 3.12   | 19.93 ± 9.84  |
| 6<br>(sea water)   | 2.05 ± 0.98  | < 0.70      | < 0.25      | 4.28 ± 1.99   | < 2.47      | < 2.67        | 1.96 ± 0.89   | 9.47 ± 4.23   |
| 7<br>(sea water)   | 1.93 ± 0.95  | < 0.70      | < 0.25      | 5.02 ± 2.48   | < 2.47      | < 2.67        | < 1.87        | 5.92 ± 2.87   |
| 8<br>(sea water)   | 12.56 ± 6.12 | 1.10 ± 0.51 | 0.25 ± 0.11 | 29.10 ± 14.45 | 3.18 ± 1.53 | 24.89 ± 12.34 | 34.57 ± 17.07 | 42.00 ± 20.82 |
| 9<br>(sea water)   | 4.47 ± 2.19  | 0.81 ± 0.38 | < 0.25      | 8.95 ± 4.42   | 2.59 ± 1.19 | 2.75 ± 1.35   | 6.02 ± 2.67   | 24.27 ± 12.05 |
| 10<br>(sea water)  | 1.38 ± 0.62  | < 0.70      | < 0.25      | 5.03 ± 2.45   | < 2.47      | nd            | 2.26 ± 1.01   | 12.06 ± 5.91  |

**Table S4.** Comparisons of heavy metal (HMs) concentrations detected in previous studies carried out from other river catchments and transitional waters in areas close to the study.

|                            |                       | Heavy Metals |              |             |                |                |               |               |               |
|----------------------------|-----------------------|--------------|--------------|-------------|----------------|----------------|---------------|---------------|---------------|
| Area                       | References            | As           | Hg           | Cd          | Cr             | Cu             | Ni            | Pb            | Zn            |
| DPs (µg/L <sup>-1</sup> )  |                       |              |              |             |                |                |               |               |               |
| Sarno River, Italy         | Montuori et al., [72] | 3.10 - 28.57 | 0.1 – 0.74   | 0.03 – 0.79 | 41.63- 1669.84 | 0.11 – 9.51    | 0.47 – 22.11  | 0.41 – 10.47  | 0.14 – 5.17   |
| Tiber River, Italy         | Montuori et al., [26] | 2.05 - 92.04 | 0.1 – 0.90   | 0.06 – 5.42 | 1.05 – 94.61   | 0.34 – 821.12  | 0.33 – 77.92  | 1.08 – 186.74 | 0.16 – 155.38 |
| Volturno River, Italy      | De Rosa et al., [35]  | 0.52 – 15.07 | 0.10 – 2.72  | 0.09 – 3.00 | 1.00 – 15.77   | 0.10 – 14.00   | 0.10 – 11.75  | 0.45 – 15.22  | 0.11 – 6.20   |
| <i>This study</i>          | Di Duca et al.,       | nd – 14.28   | nd – 2.35    | nd – 1.69   | nd – 14.97     | nd – 13.23     | nd – 11.15    | nd – 14.41    | nd – 5.46     |
| SPM (µg/L <sup>-1</sup> )  |                       |              |              |             |                |                |               |               |               |
| Sarno River, Italy         | Montuori et al., [72] | 1.94 – 106.7 | 0.06 – 134.2 | 0.03 – 0.62 | 14.1 – 1149.7  | 36.3 – 809.8   | 3.3 – 1009.3  | 1.02 – 4063.5 | 59.4 – 3327.2 |
| Tiber River, Italy         | Montuori et al., [26] | 2.01 – 243.9 | 0.11 – 6.37  | 0.05 – 4.80 | 1.02 – 131.6   | 5.21 – 1550.3  | 0.68 – 172.5  | 0.62 – 272.9  | 0.32 – 505.2  |
| Volturno River, Italy      | De Rosa et al., [35]  | 1.00 – 120.3 | 1.01 – 12.07 | 0.01 – 5.89 | 1.10 – 35.55   | 0.63 – 142.65  | 0.52 – 91.27  | 1.00 – 89.67  | 0.01 – 110.12 |
| <i>This study</i>          | Di Duca et al.,       | nd – 116.52  | nd – 10.03   | nd – 4.57   | nd – 33.47     | nd – 139.85    | nd – 88.74    | nd – 86.66    | nd – 107.54   |
| SED (µg/kg <sup>-1</sup> ) |                       |              |              |             |                |                |               |               |               |
| Sarno River, Italy         | Montuori et al., [72] | 0.24 – 69.3  | 0.2 – 1.02   | 0.39 – 2.92 | 23.77 – 514.40 | 33.64 – 580.18 | 1.58 – 651.70 | 0.47 – 1658.1 | 55.00 – 802.8 |
| Tiber River, Italy         | Montuori et al., [26] | 2.65 – 45.2  | 0.05 – 1.14  | 0.08 – 2.22 | 8.52 – 189.91  | 16.01 – 527.81 | 6.22 – 494.26 | 3.07 – 186.67 | 6.18 – 413.36 |
| Volturno River, Italy      | De Rosa et al., [35]  | 1.00 – 14.08 | 0.06 – 1.45  | 0.10 – 0.32 | 2.92 – 31.10   | 1.67 – 8.40    | 0.88 – 26.49  | 0.65 – 36.27  | 7.03 – 43.06  |
| <i>This study</i>          | Di Duca et al.        | nd – 12.56   | nd – 1.10    | nd – 0.98   | 1.22 – 29.10   | nd – 7.32      | nd – 24.89    | nd – 34.57    | 5.92 – 42.00  |

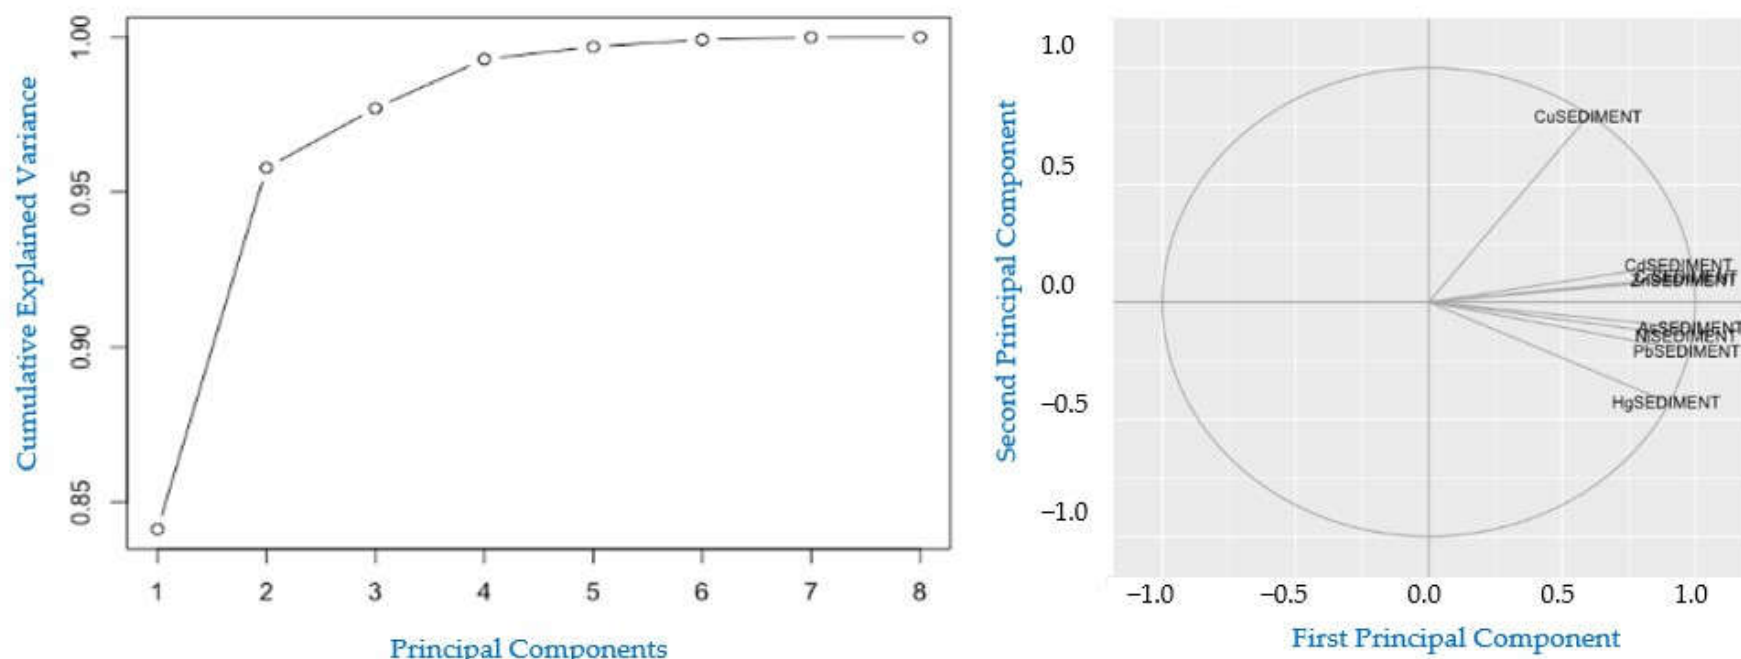

**Figure S1.** PCA of the sediment data: Eigen values Plot (on the left) and PCA of the sediment data: Loading plot for the first and second principal component (on the right).



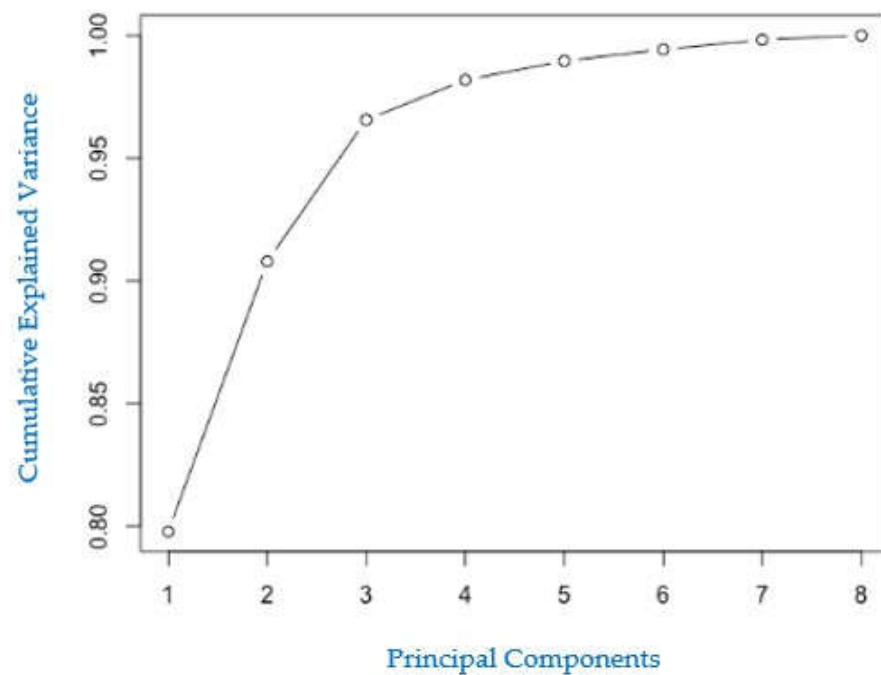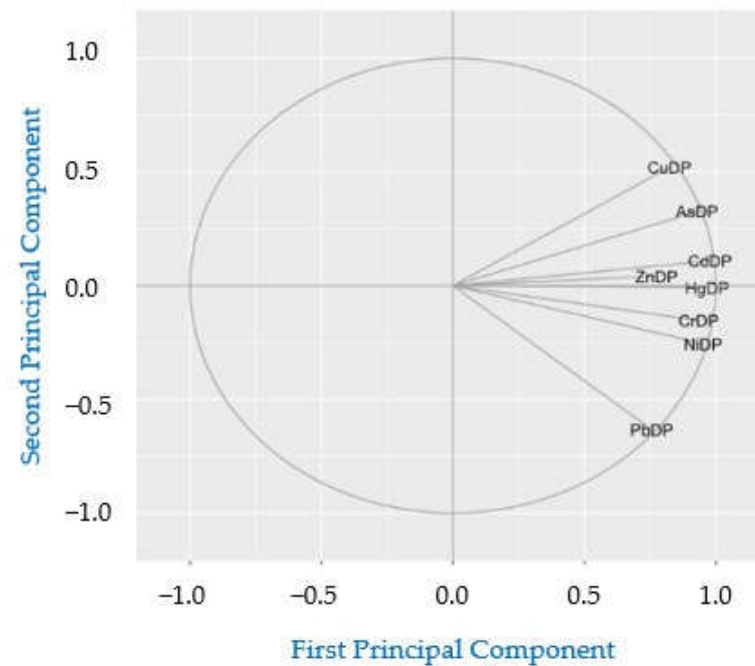

**Figure S2.** PCA of the dissolved phase (DP) data: Eigen values Plot (on the left) and PCA of the sediment data: Loading plot for the first and second principal component (on the right).

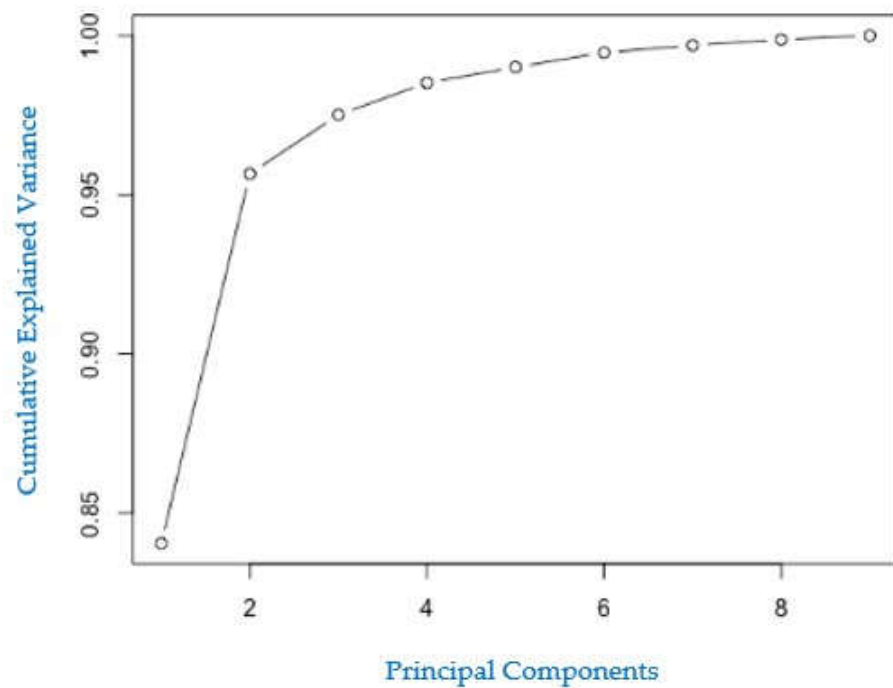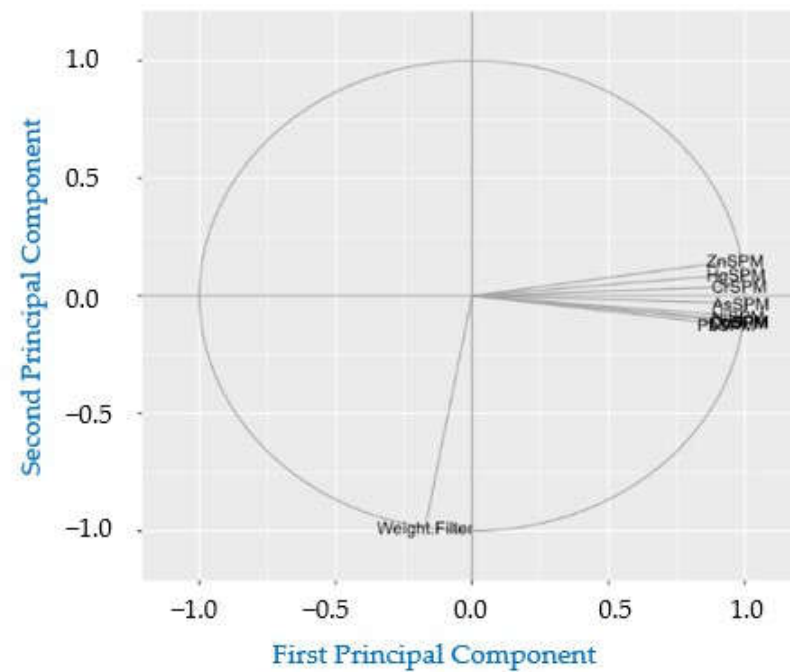

**Figure S3.** PCA of the suspended particulate matter (SPM) data: Eigen values Plot (on the left) and PCA of the SPM data: Loading plot for the first and second principal component (on the right).
